# Supplementary material for: Theoretical study of the oxidation mechanisms of naphthalene initiated by hydroxyl radicals: the O2 addition reaction pathways
Source: Royal Society of Chemistry journal article supplement (doi:10.1039/c5cp01934f), 2015-01-01
Supplement: c5cp01934f1.pdf [file c5cp01934f1.pdf]

# Theoretical Study of the Oxidation Mechanisms of Naphthalene Initiated by Hydroxyl Radicals: The O<sub>2</sub> Addition Reaction Pathways

Abolfazl Shiroudi,<sup>a</sup> Michael S. Deleuze<sup>\*,a</sup> and Sébastien Canneaux<sup>b</sup>

<sup>a</sup> Center of Molecular and Materials Modelling, Hasselt University, Agoralaan, Gebouw D, B-3590 Diepenbeek, Belgium

<sup>b</sup> Université Lille1 Sciences et Technologies, Cité scientifique, 59655 Villeneuve d'Ascq Cedex, France

## Electronic Supplementary Information (ESI)

**Table S1:** Effective rate constants (in cm<sup>3</sup> molecule<sup>-1</sup> s<sup>-1</sup>) for the reported reaction channels obtained by means of RRKM theory at different pressures and temperatures, according to the computed UM06-2x/aug-cc-pVTZ energy profiles ( $x=1,3$  and  $y=2,4$ ).

**Table S1a:** [ $T=298$  K; *syn* isomer]

| Pressure | Reaction | IM <sub>x</sub> →R1+O <sub>2</sub> | IM1→R1-2OO- <i>s</i>                 | IM3→R1-4OO- <i>s</i>                 | $k_{\text{eff}}(\mathbf{1})$                                                                     | $k_{\text{eff}}(\mathbf{3})$                                                                     |
|----------|----------|------------------------------------|--------------------------------------|--------------------------------------|--------------------------------------------------------------------------------------------------|--------------------------------------------------------------------------------------------------|
|          |          | $k_{-1}$ (s <sup>-1</sup> )        | $k_2(\mathbf{1})$ (s <sup>-1</sup> ) | $k_2(\mathbf{3})$ (s <sup>-1</sup> ) | R1+O <sub>2</sub> ⇌R1-2OO- <i>s</i><br>(cm <sup>3</sup> molecule <sup>-1</sup> s <sup>-1</sup> ) | R1+O <sub>2</sub> ⇌R1-4OO- <i>s</i><br>(cm <sup>3</sup> molecule <sup>-1</sup> s <sup>-1</sup> ) |
| 1.00E+04 |          | 4.36E+16                           | 1.78E+05                             | 1.07E+06                             | 3.93E-19                                                                                         | 2.38E-18                                                                                         |
| 1.00E+02 |          | 4.36E+16                           | 1.78E+05                             | 1.07E+06                             | 3.93E-19                                                                                         | 2.38E-18                                                                                         |
| 1.00E+00 |          | 4.36E+16                           | 1.77E+05                             | 1.07E+06                             | 3.93E-19                                                                                         | 2.36E-18                                                                                         |
| 1.00E-02 |          | 4.36E+16                           | 1.54E+05                             | 7.55E+05                             | 3.41E-19                                                                                         | 1.67E-18                                                                                         |
| 1.00E-04 |          | 4.36E+16                           | 2.82E+04                             | 6.65E+04                             | 6.23E-20                                                                                         | 1.47E-19                                                                                         |
| 1.00E-06 |          | 4.36E+16                           | 7.09E+02                             | 1.12E+03                             | 1.57E-21                                                                                         | 2.49E-21                                                                                         |
| 1.00E-08 |          | 4.36E+16                           | 8.02E+00                             | 1.17E+01                             | 1.78E-23                                                                                         | 2.58E-23                                                                                         |
| 1.00E-10 |          | 4.36E+16                           | 8.04E-02                             | 1.17E-01                             | 1.78E-25                                                                                         | 2.59E-25                                                                                         |
| 1.00E-12 |          | 4.36E+16                           | 8.04E-04                             | 1.17E-03                             | 1.78E-27                                                                                         | 2.59E-27                                                                                         |

\* Corresponding author: Tel: +32-11-268303 ; E-mail: michael.deleuze@uhasselt.be

**Table S1b:** [ $T= 336$  K; *syn* isomer]

| Pressure | Reaction | IMx→R1+O <sub>2</sub>       | IM1→R1-2OO- <i>s</i>                 | IM3→R1-4OO- <i>s</i>                 | $k_{\text{eff}}(\mathbf{1})$                                                                     | $k_{\text{eff}}(\mathbf{3})$                                                                     |
|----------|----------|-----------------------------|--------------------------------------|--------------------------------------|--------------------------------------------------------------------------------------------------|--------------------------------------------------------------------------------------------------|
|          |          | $k_{-1}$ (s <sup>-1</sup> ) | $k_2(\mathbf{1})$ (s <sup>-1</sup> ) | $k_2(\mathbf{3})$ (s <sup>-1</sup> ) | R1+O <sub>2</sub> ⇌R1-2OO- <i>s</i><br>(cm <sup>3</sup> molecule <sup>-1</sup> s <sup>-1</sup> ) | R1+O <sub>2</sub> ⇌R1-4OO- <i>s</i><br>(cm <sup>3</sup> molecule <sup>-1</sup> s <sup>-1</sup> ) |
| 1.00E+04 |          | 1.80E+16                    | 7.11E+05                             | 3.57E+06                             | 1.05E-18                                                                                         | 5.29E-18                                                                                         |
| 1.00E+02 |          | 1.80E+16                    | 7.11E+05                             | 3.57E+06                             | 1.05E-18                                                                                         | 5.29E-18                                                                                         |
| 1.00E+00 |          | 1.80E+16                    | 7.08E+05                             | 3.53E+06                             | 1.05E-18                                                                                         | 5.23E-18                                                                                         |
| 1.00E-02 |          | 1.80E+16                    | 5.49E+05                             | 2.03E+06                             | 8.13E-19                                                                                         | 3.01E-18                                                                                         |
| 1.00E-04 |          | 1.80E+16                    | 6.23E+04                             | 1.12E+05                             | 9.23E-20                                                                                         | 1.67E-19                                                                                         |
| 1.00E-06 |          | 1.80E+16                    | 1.19E+03                             | 1.59E+03                             | 1.76E-21                                                                                         | 2.35E-21                                                                                         |
| 1.00E-08 |          | 1.80E+16                    | 1.29E+01                             | 1.62E+01                             | 1.91E-23                                                                                         | 2.41E-23                                                                                         |
| 1.00E-10 |          | 1.80E+16                    | 1.29E-01                             | 1.62E-01                             | 1.91E-25                                                                                         | 2.41E-25                                                                                         |
| 1.00E-12 |          | 1.80E+16                    | 1.29E-03                             | 1.62E-03                             | 1.91E-27                                                                                         | 2.41E-27                                                                                         |

**Table S1c:** [ $T= 400$  K; *syn* isomer]

| Pressure | Reaction | IMx→R1+O <sub>2</sub>       | IM1→R1-2OO- <i>s</i>                 | IM3→R1-4OO- <i>s</i>                 | $k_{\text{eff}}(\mathbf{1})$                                                                     | $k_{\text{eff}}(\mathbf{3})$                                                                     |
|----------|----------|-----------------------------|--------------------------------------|--------------------------------------|--------------------------------------------------------------------------------------------------|--------------------------------------------------------------------------------------------------|
|          |          | $k_{-1}$ (s <sup>-1</sup> ) | $k_2(\mathbf{1})$ (s <sup>-1</sup> ) | $k_2(\mathbf{3})$ (s <sup>-1</sup> ) | R1+O <sub>2</sub> ⇌R1-2OO- <i>s</i><br>(cm <sup>3</sup> molecule <sup>-1</sup> s <sup>-1</sup> ) | R1+O <sub>2</sub> ⇌R1-4OO- <i>s</i><br>(cm <sup>3</sup> molecule <sup>-1</sup> s <sup>-1</sup> ) |
| 1.00E+04 |          | 6.11E+15                    | 4.00E+06                             | 1.59E+07                             | 3.69E-18                                                                                         | 1.47E-17                                                                                         |
| 1.00E+02 |          | 6.11E+15                    | 4.00E+06                             | 1.59E+07                             | 3.69E-18                                                                                         | 1.47E-17                                                                                         |
| 1.00E+00 |          | 6.11E+15                    | 3.96E+06                             | 1.55E+07                             | 3.65E-18                                                                                         | 1.43E-17                                                                                         |
| 1.00E-02 |          | 6.11E+15                    | 2.31E+06                             | 5.74E+06                             | 2.13E-18                                                                                         | 5.29E-18                                                                                         |
| 1.00E-04 |          | 6.11E+15                    | 1.25E+05                             | 1.67E+05                             | 1.15E-19                                                                                         | 1.54E-19                                                                                         |
| 1.00E-06 |          | 6.11E+15                    | 1.73E+03                             | 1.95E+03                             | 1.60E-21                                                                                         | 1.79E-21                                                                                         |
| 1.00E-08 |          | 6.11E+15                    | 1.79E+01                             | 1.96E+01                             | 1.65E-23                                                                                         | 1.81E-23                                                                                         |
| 1.00E-10 |          | 6.11E+15                    | 1.79E-01                             | 1.96E-01                             | 1.65E-25                                                                                         | 1.81E-25                                                                                         |
| 1.00E-12 |          | 6.11E+15                    | 1.79E-03                             | 1.96E-03                             | 1.65E-27                                                                                         | 1.81E-27                                                                                         |

**Table S1d:** [ $T= 298$  K; *anti* isomer]

| Pressure | Reaction | IMy→R1+O <sub>2</sub>       | IM2→R1-2OO- <i>a</i>                 | IM4→R1-4OO- <i>a</i>                 | $k_{\text{eff}}(\mathbf{2})$                                                                     | $k_{\text{eff}}(\mathbf{4})$                                                                     |
|----------|----------|-----------------------------|--------------------------------------|--------------------------------------|--------------------------------------------------------------------------------------------------|--------------------------------------------------------------------------------------------------|
|          |          | $k_{-1}$ (s <sup>-1</sup> ) | $k_2(\mathbf{2})$ (s <sup>-1</sup> ) | $k_2(\mathbf{4})$ (s <sup>-1</sup> ) | R1+O <sub>2</sub> ⇌R1-2OO- <i>a</i><br>(cm <sup>3</sup> molecule <sup>-1</sup> s <sup>-1</sup> ) | R1+O <sub>2</sub> ⇌R1-4OO- <i>a</i><br>(cm <sup>3</sup> molecule <sup>-1</sup> s <sup>-1</sup> ) |
| 1.00E+04 |          | 1.88E+19                    | 1.18E+06                             | 9.39E+06                             | 4.92E-21                                                                                         | 3.90E-20                                                                                         |
| 1.00E+02 |          | 1.88E+19                    | 1.18E+06                             | 9.38E+06                             | 4.92E-21                                                                                         | 3.90E-20                                                                                         |
| 1.00E+00 |          | 1.88E+19                    | 1.17E+06                             | 8.92E+06                             | 4.85E-21                                                                                         | 3.71E-20                                                                                         |
| 1.00E-02 |          | 1.88E+19                    | 6.54E+05                             | 2.82E+06                             | 2.72E-21                                                                                         | 1.17E-20                                                                                         |
| 1.00E-04 |          | 1.88E+19                    | 4.44E+04                             | 9.44E+04                             | 1.85E-22                                                                                         | 3.92E-22                                                                                         |
| 1.00E-06 |          | 1.88E+19                    | 7.47E+02                             | 1.19E+03                             | 3.11E-24                                                                                         | 4.95E-24                                                                                         |
| 1.00E-08 |          | 1.88E+19                    | 7.83E+00                             | 1.20E+01                             | 3.26E-26                                                                                         | 4.99E-26                                                                                         |
| 1.00E-10 |          | 1.88E+19                    | 7.84E-02                             | 1.20E-01                             | 3.26E-28                                                                                         | 4.99E-28                                                                                         |
| 1.00E-12 |          | 1.88E+19                    | 7.84E-04                             | 1.20E-03                             | 3.26E-30                                                                                         | 4.99E-30                                                                                         |

**Table S1e:** [ $T= 336$  K; *anti* isomer]

| Pressure | Reaction | IM <sub>y</sub> →R1+O <sub>2</sub> | IM <sub>2</sub> →R1-2OO- <i>a</i>    | IM <sub>4</sub> →R1-4OO- <i>a</i>    | $k_{\text{eff}}(\mathbf{2})$                                                                     | $k_{\text{eff}}(\mathbf{4})$                                                                     |
|----------|----------|------------------------------------|--------------------------------------|--------------------------------------|--------------------------------------------------------------------------------------------------|--------------------------------------------------------------------------------------------------|
|          |          | $k_{-1}$ (s <sup>-1</sup> )        | $k_2(\mathbf{2})$ (s <sup>-1</sup> ) | $k_2(\mathbf{4})$ (s <sup>-1</sup> ) | R1+O <sub>2</sub> ⇌R1-2OO- <i>a</i><br>(cm <sup>3</sup> molecule <sup>-1</sup> s <sup>-1</sup> ) | R1+O <sub>2</sub> ⇌R1-4OO- <i>a</i><br>(cm <sup>3</sup> molecule <sup>-1</sup> s <sup>-1</sup> ) |
| 1.00E+04 |          | 3.92E+18                           | 5.00E+06                             | 3.19E+07                             | 2.45E-20                                                                                         | 1.56E-19                                                                                         |
| 1.00E+02 |          | 3.92E+18                           | 4.99E+06                             | 3.18E+07                             | 2.45E-20                                                                                         | 1.56E-19                                                                                         |
| 1.00E+00 |          | 3.92E+18                           | 4.85E+06                             | 2.90E+07                             | 2.37E-20                                                                                         | 1.42E-19                                                                                         |
| 1.00E-02 |          | 3.92E+18                           | 2.00E+06                             | 6.01E+06                             | 9.79E-21                                                                                         | 2.94E-20                                                                                         |
| 1.00E-04 |          | 3.92E+18                           | 8.70E+04                             | 1.42E+05                             | 4.26E-22                                                                                         | 6.97E-22                                                                                         |
| 1.00E-06 |          | 3.92E+18                           | 1.23E+03                             | 1.64E+03                             | 6.04E-24                                                                                         | 8.05E-24                                                                                         |
| 1.00E-08 |          | 3.92E+18                           | 1.27E+01                             | 1.65E+01                             | 6.21E-26                                                                                         | 8.09E-26                                                                                         |
| 1.00E-10 |          | 3.92E+18                           | 1.27E-01                             | 1.65E-01                             | 6.21E-28                                                                                         | 8.09E-28                                                                                         |
| 1.00E-12 |          | 3.92E+18                           | 1.27E-03                             | 1.65E-03                             | 6.21E-30                                                                                         | 8.09E-30                                                                                         |

**Table S1f:** [ $T= 400$  K; *anti* isomer]

| Pressure | Reaction | IM <sub>y</sub> →R1+O <sub>2</sub> | IM <sub>2</sub> →R1-2OO- <i>a</i>    | IM <sub>4</sub> →R1-4OO- <i>a</i>    | $k_{\text{eff}}(\mathbf{2})$                                                                     | $k_{\text{eff}}(\mathbf{4})$                                                                     |
|----------|----------|------------------------------------|--------------------------------------|--------------------------------------|--------------------------------------------------------------------------------------------------|--------------------------------------------------------------------------------------------------|
|          |          | $k_{-1}$ (s <sup>-1</sup> )        | $k_2(\mathbf{2})$ (s <sup>-1</sup> ) | $k_2(\mathbf{4})$ (s <sup>-1</sup> ) | R1+O <sub>2</sub> ⇌R1-2OO- <i>a</i><br>(cm <sup>3</sup> molecule <sup>-1</sup> s <sup>-1</sup> ) | R1+O <sub>2</sub> ⇌R1-4OO- <i>a</i><br>(cm <sup>3</sup> molecule <sup>-1</sup> s <sup>-1</sup> ) |
| 1.00E+04 |          | 5.61E+17                           | 3.01E+07                             | 1.46E+08                             | 1.87E-19                                                                                         | 9.10E-19                                                                                         |
| 1.00E+02 |          | 5.61E+17                           | 3.01E+07                             | 1.46E+08                             | 1.87E-19                                                                                         | 9.08E-19                                                                                         |
| 1.00E+00 |          | 5.61E+17                           | 2.77E+07                             | 1.17E+08                             | 1.72E-19                                                                                         | 7.29E-19                                                                                         |
| 1.00E-02 |          | 5.61E+17                           | 6.23E+06                             | 1.19E+07                             | 3.87E-20                                                                                         | 7.40E-20                                                                                         |
| 1.00E-04 |          | 5.61E+17                           | 1.50E+05                             | 1.86E+05                             | 9.32E-22                                                                                         | 1.16E-21                                                                                         |
| 1.00E-06 |          | 5.61E+17                           | 1.76E+03                             | 1.97E+03                             | 1.09E-23                                                                                         | 1.22E-23                                                                                         |
| 1.00E-08 |          | 5.61E+17                           | 1.78E+01                             | 1.97E+01                             | 1.11E-25                                                                                         | 1.23E-25                                                                                         |
| 1.00E-10 |          | 5.61E+17                           | 1.78E-01                             | 1.97E-01                             | 1.11E-27                                                                                         | 1.23E-27                                                                                         |
| 1.00E-12 |          | 5.61E+17                           | 1.78E-03                             | 1.97E-03                             | 1.11E-29                                                                                         | 1.23E-29                                                                                         |

**Table S2:** Kinetic rate constants (in  $\text{s}^{-1}$ ), effective rate constants, and branching ratios for all reaction steps involved in the reported chemical pathways at ambient temperature and different pressures using the RRKM theory, according to the computed UM06-2x/aug-cc-pVTZ energy profiles ( $z=1,2,3,4$ ).

**Table S2a:**

| Parameter<br>Reaction pathway                              | $P = 10^4 \text{ bar}$ |                                                 |                               |                                                                                                                         |                         |
|------------------------------------------------------------|------------------------|-------------------------------------------------|-------------------------------|-------------------------------------------------------------------------------------------------------------------------|-------------------------|
|                                                            | Rate constant          |                                                 |                               | effective rate constant                                                                                                 | Branching ratio ( $R$ ) |
|                                                            | $K_p$                  | $k_{-1}$<br>IMz $\rightarrow$ R1+O <sub>2</sub> | $k_2$<br>IMz $\rightarrow$ R2 | $k_{\text{eff}}$ (cm <sup>3</sup> molecule <sup>-1</sup> s <sup>-1</sup> )<br>R1+O <sub>2</sub> $\rightleftharpoons$ R2 |                         |
| <b><math>T=298 \text{ K}</math></b>                        |                        |                                                 |                               |                                                                                                                         |                         |
| R1+O <sub>2</sub> $\rightleftharpoons$ R1-2OO- <i>syn</i>  | 5.38E-05               | 4.36E+16                                        | 1.78E+05                      | 3.93E-19                                                                                                                | 13.95                   |
| R1+O <sub>2</sub> $\rightleftharpoons$ R1-4OO- <i>syn</i>  | 5.38E-05               | 4.36E+16                                        | 1.07E+06                      | 2.38E-18                                                                                                                | 84.49                   |
| R1+O <sub>2</sub> $\rightleftharpoons$ R1-2OO- <i>anti</i> | 1.01E-07               | 1.88E+19                                        | 1.18E+06                      | 4.92E-21                                                                                                                | 0.17                    |
| R1+O <sub>2</sub> $\rightleftharpoons$ R1-4OO- <i>anti</i> | 1.01E-07               | 1.88E+19                                        | 9.39E+06                      | 3.90E-20                                                                                                                | 1.38                    |
| <b><math>T=336 \text{ K}</math></b>                        |                        |                                                 |                               |                                                                                                                         |                         |
| R1+O <sub>2</sub> $\rightleftharpoons$ R1-2OO- <i>syn</i>  | 3.60E-05               | 4.36E+16                                        | 7.11E+05                      | 1.05E-18                                                                                                                | 16.10                   |
| R1+O <sub>2</sub> $\rightleftharpoons$ R1-4OO- <i>syn</i>  | 3.60E-05               | 4.36E+16                                        | 3.57E+06                      | 5.29E-18                                                                                                                | 81.13                   |
| R1+O <sub>2</sub> $\rightleftharpoons$ R1-2OO- <i>anti</i> | 1.19E-07               | 1.88E+19                                        | 5.00E+06                      | 2.45E-20                                                                                                                | 0.38                    |
| R1+O <sub>2</sub> $\rightleftharpoons$ R1-4OO- <i>anti</i> | 1.19E-07               | 1.88E+19                                        | 3.19E+07                      | 1.56E-19                                                                                                                | 2.39                    |
| <b><math>T=400 \text{ K}</math></b>                        |                        |                                                 |                               |                                                                                                                         |                         |
| R1+O <sub>2</sub> $\rightleftharpoons$ R1-2OO- <i>syn</i>  | 2.24E-05               | 4.36E+16                                        | 4.00E+06                      | 3.69E-18                                                                                                                | 18.94                   |
| R1+O <sub>2</sub> $\rightleftharpoons$ R1-4OO- <i>syn</i>  | 2.24E-05               | 4.36E+16                                        | 1.59E+07                      | 1.47E-17                                                                                                                | 75.43                   |
| R1+O <sub>2</sub> $\rightleftharpoons$ R1-2OO- <i>anti</i> | 1.51E-07               | 1.88E+19                                        | 3.01E+07                      | 1.87E-19                                                                                                                | 0.96                    |
| R1+O <sub>2</sub> $\rightleftharpoons$ R1-4OO- <i>anti</i> | 1.51E-07               | 1.88E+19                                        | 1.46E+08                      | 9.10E-19                                                                                                                | 4.67                    |

**Table S2b:**

| Parameter<br>Reaction pathway                              | $P = 10^2 \text{ bar}$ |                                                 |                               |                                                                                                                         |                         |
|------------------------------------------------------------|------------------------|-------------------------------------------------|-------------------------------|-------------------------------------------------------------------------------------------------------------------------|-------------------------|
|                                                            | Rate constant          |                                                 |                               | effective rate constant                                                                                                 | Branching ratio ( $R$ ) |
|                                                            | $K_p$                  | $k_{-1}$<br>IMz $\rightarrow$ R1+O <sub>2</sub> | $k_2$<br>IMz $\rightarrow$ R2 | $k_{\text{eff}}$ (cm <sup>3</sup> molecule <sup>-1</sup> s <sup>-1</sup> )<br>R1+O <sub>2</sub> $\rightleftharpoons$ R2 |                         |
| <b><math>T=298 \text{ K}</math></b>                        |                        |                                                 |                               |                                                                                                                         |                         |
| R1+O <sub>2</sub> $\rightleftharpoons$ R1-2OO- <i>syn</i>  | 5.38E-05               | 4.36E+16                                        | 1.78E+05                      | 3.93E-19                                                                                                                | 13.95                   |
| R1+O <sub>2</sub> $\rightleftharpoons$ R1-4OO- <i>syn</i>  | 5.38E-05               | 4.36E+16                                        | 1.07E+06                      | 2.38E-18                                                                                                                | 84.49                   |
| R1+O <sub>2</sub> $\rightleftharpoons$ R1-2OO- <i>anti</i> | 1.01E-07               | 1.88E+19                                        | 1.18E+06                      | 4.92E-21                                                                                                                | 0.17                    |
| R1+O <sub>2</sub> $\rightleftharpoons$ R1-4OO- <i>anti</i> | 1.01E-07               | 1.88E+19                                        | 9.38E+06                      | 3.90E-20                                                                                                                | 1.38                    |
| <b><math>T=336 \text{ K}</math></b>                        |                        |                                                 |                               |                                                                                                                         |                         |
| R1+O <sub>2</sub> $\rightleftharpoons$ R1-2OO- <i>syn</i>  | 3.60E-05               | 4.36E+16                                        | 7.11E+05                      | 1.05E-18                                                                                                                | 16.10                   |
| R1+O <sub>2</sub> $\rightleftharpoons$ R1-4OO- <i>syn</i>  | 3.60E-05               | 4.36E+16                                        | 3.57E+06                      | 5.29E-18                                                                                                                | 81.13                   |
| R1+O <sub>2</sub> $\rightleftharpoons$ R1-2OO- <i>anti</i> | 1.19E-07               | 1.88E+19                                        | 4.99E+06                      | 2.45E-20                                                                                                                | 0.38                    |
| R1+O <sub>2</sub> $\rightleftharpoons$ R1-4OO- <i>anti</i> | 1.19E-07               | 1.88E+19                                        | 3.18E+07                      | 1.56E-19                                                                                                                | 2.39                    |
| <b><math>T=400 \text{ K}</math></b>                        |                        |                                                 |                               |                                                                                                                         |                         |
| R1+O <sub>2</sub> $\rightleftharpoons$ R1-2OO- <i>syn</i>  | 2.24E-05               | 4.36E+16                                        | 4.00E+06                      | 3.69E-18                                                                                                                | 18.94                   |
| R1+O <sub>2</sub> $\rightleftharpoons$ R1-4OO- <i>syn</i>  | 2.24E-05               | 4.36E+16                                        | 1.59E+07                      | 1.47E-17                                                                                                                | 75.44                   |
| R1+O <sub>2</sub> $\rightleftharpoons$ R1-2OO- <i>anti</i> | 1.51E-07               | 1.88E+19                                        | 3.01E+07                      | 1.87E-19                                                                                                                | 0.96                    |
| R1+O <sub>2</sub> $\rightleftharpoons$ R1-4OO- <i>anti</i> | 1.51E-07               | 1.88E+19                                        | 1.46E+08                      | 9.08E-19                                                                                                                | 4.66                    |

**Table S2c:**

| Reaction pathway                                           | <b><math>P = 1.0</math> bar</b> |                                                 |                               |                                                                                               |                         |
|------------------------------------------------------------|---------------------------------|-------------------------------------------------|-------------------------------|-----------------------------------------------------------------------------------------------|-------------------------|
|                                                            | $K_p$                           | Rate constant                                   |                               | effective rate constant<br>$k_{\text{eff}}(\text{cm}^3 \text{ molecule}^{-1} \text{ s}^{-1})$ | Branching ratio ( $R$ ) |
|                                                            |                                 | $k_{-1}$<br>IMz $\rightarrow$ R1+O <sub>2</sub> | $k_2$<br>IMz $\rightarrow$ R2 |                                                                                               |                         |
| <b><math>T=298</math> K</b>                                |                                 |                                                 |                               |                                                                                               |                         |
| R1+O <sub>2</sub> $\rightleftharpoons$ R1-2OO- <i>syn</i>  | 5.38E-05                        | 4.36E+16                                        | 1.77E+05                      | 3.93E-19                                                                                      | 14.06                   |
| R1+O <sub>2</sub> $\rightleftharpoons$ R1-4OO- <i>syn</i>  | 5.38E-05                        | 4.36E+16                                        | 1.07E+06                      | 2.36E-18                                                                                      | 84.44                   |
| R1+O <sub>2</sub> $\rightleftharpoons$ R1-2OO- <i>anti</i> | 1.01E-07                        | 1.88E+19                                        | 1.17E+06                      | 4.85E-21                                                                                      | 0.17                    |
| R1+O <sub>2</sub> $\rightleftharpoons$ R1-4OO- <i>anti</i> | 1.01E-07                        | 1.88E+19                                        | 8.92E+06                      | 3.71E-20                                                                                      | 1.33                    |
| <b><math>T=336</math> K</b>                                |                                 |                                                 |                               |                                                                                               |                         |
| R1+O <sub>2</sub> $\rightleftharpoons$ R1-2OO- <i>syn</i>  | 3.60E-05                        | 4.36E+16                                        | 7.08E+05                      | 1.05E-18                                                                                      | 16.29                   |
| R1+O <sub>2</sub> $\rightleftharpoons$ R1-4OO- <i>syn</i>  | 3.60E-05                        | 4.36E+16                                        | 3.53E+06                      | 5.23E-18                                                                                      | 81.14                   |
| R1+O <sub>2</sub> $\rightleftharpoons$ R1-2OO- <i>anti</i> | 1.19E-07                        | 1.88E+19                                        | 4.85E+06                      | 2.37E-20                                                                                      | 0.37                    |
| R1+O <sub>2</sub> $\rightleftharpoons$ R1-4OO- <i>anti</i> | 1.19E-07                        | 1.88E+19                                        | 2.90E+07                      | 1.42E-19                                                                                      | 2.20                    |
| <b><math>T=400</math> K</b>                                |                                 |                                                 |                               |                                                                                               |                         |
| R1+O <sub>2</sub> $\rightleftharpoons$ R1-2OO- <i>syn</i>  | 2.24E-05                        | 4.36E+16                                        | 3.96E+06                      | 3.65E-18                                                                                      | 19.36                   |
| R1+O <sub>2</sub> $\rightleftharpoons$ R1-4OO- <i>syn</i>  | 2.24E-05                        | 4.36E+16                                        | 1.55E+07                      | 1.43E-17                                                                                      | 75.86                   |
| R1+O <sub>2</sub> $\rightleftharpoons$ R1-2OO- <i>anti</i> | 1.51E-07                        | 1.88E+19                                        | 2.77E+07                      | 1.72E-19                                                                                      | 0.91                    |
| R1+O <sub>2</sub> $\rightleftharpoons$ R1-4OO- <i>anti</i> | 1.51E-07                        | 1.88E+19                                        | 1.17E+08                      | 7.29E-19                                                                                      | 3.87                    |

**Table S2d:**

| Reaction pathway                                           | <b><math>P = 10^{-2}</math> bar</b> |                                                 |                               |                                                                                               |                         |
|------------------------------------------------------------|-------------------------------------|-------------------------------------------------|-------------------------------|-----------------------------------------------------------------------------------------------|-------------------------|
|                                                            | $K_p$                               | Rate constant                                   |                               | effective rate constant<br>$k_{\text{eff}}(\text{cm}^3 \text{ molecule}^{-1} \text{ s}^{-1})$ | Branching ratio ( $R$ ) |
|                                                            |                                     | $k_{-1}$<br>IMz $\rightarrow$ R1+O <sub>2</sub> | $k_2$<br>IMz $\rightarrow$ R2 |                                                                                               |                         |
| <b><math>T=298</math> K</b>                                |                                     |                                                 |                               |                                                                                               |                         |
| R1+O <sub>2</sub> $\rightleftharpoons$ R1-2OO- <i>syn</i>  | 5.38E-05                            | 4.36E+16                                        | 1.54E+05                      | 3.41E-19                                                                                      | 16.84                   |
| R1+O <sub>2</sub> $\rightleftharpoons$ R1-4OO- <i>syn</i>  | 5.38E-05                            | 4.36E+16                                        | 7.55E+05                      | 1.67E-18                                                                                      | 82.45                   |
| R1+O <sub>2</sub> $\rightleftharpoons$ R1-2OO- <i>anti</i> | 1.01E-07                            | 1.88E+19                                        | 6.54E+05                      | 2.72E-21                                                                                      | 0.13                    |
| R1+O <sub>2</sub> $\rightleftharpoons$ R1-4OO- <i>anti</i> | 1.01E-07                            | 1.88E+19                                        | 2.82E+06                      | 1.17E-20                                                                                      | 0.58                    |
| <b><math>T=336</math> K</b>                                |                                     |                                                 |                               |                                                                                               |                         |
| R1+O <sub>2</sub> $\rightleftharpoons$ R1-2OO- <i>syn</i>  | 3.60E-05                            | 4.36E+16                                        | 5.49E+05                      | 8.13E-19                                                                                      | 21.05                   |
| R1+O <sub>2</sub> $\rightleftharpoons$ R1-4OO- <i>syn</i>  | 3.60E-05                            | 4.36E+16                                        | 2.03E+06                      | 3.01E-18                                                                                      | 77.94                   |
| R1+O <sub>2</sub> $\rightleftharpoons$ R1-2OO- <i>anti</i> | 1.19E-07                            | 1.88E+19                                        | 2.00E+06                      | 9.79E-21                                                                                      | 0.25                    |
| R1+O <sub>2</sub> $\rightleftharpoons$ R1-4OO- <i>anti</i> | 1.19E-07                            | 1.88E+19                                        | 6.01E+06                      | 2.94E-20                                                                                      | 0.76                    |
| <b><math>T=400</math> K</b>                                |                                     |                                                 |                               |                                                                                               |                         |
| R1+O <sub>2</sub> $\rightleftharpoons$ R1-2OO- <i>syn</i>  | 2.24E-05                            | 4.36E+16                                        | 2.31E+06                      | 2.13E-18                                                                                      | 28.28                   |
| R1+O <sub>2</sub> $\rightleftharpoons$ R1-4OO- <i>syn</i>  | 2.24E-05                            | 4.36E+16                                        | 5.74E+06                      | 5.29E-18                                                                                      | 70.23                   |
| R1+O <sub>2</sub> $\rightleftharpoons$ R1-2OO- <i>anti</i> | 1.51E-07                            | 1.88E+19                                        | 6.23E+06                      | 3.87E-20                                                                                      | 0.51                    |
| R1+O <sub>2</sub> $\rightleftharpoons$ R1-4OO- <i>anti</i> | 1.51E-07                            | 1.88E+19                                        | 1.19E+07                      | 7.40E-20                                                                                      | 0.98                    |

Table S2e:

| Parameter<br>Reaction pathway                              | $P = 10^{-4}$ bar |                                                 |                               |                                                                                               |                            |
|------------------------------------------------------------|-------------------|-------------------------------------------------|-------------------------------|-----------------------------------------------------------------------------------------------|----------------------------|
|                                                            | Rate constant     |                                                 |                               | effective rate constant<br>$k_{\text{eff}}(\text{cm}^3 \text{ molecule}^{-1} \text{ s}^{-1})$ | Branching<br>ratio ( $R$ ) |
|                                                            | $K_p$             | $k_{-1}$<br>IMz $\rightarrow$ R1+O <sub>2</sub> | $k_2$<br>IMz $\rightarrow$ R2 |                                                                                               |                            |
| <b><math>T=298</math> K</b>                                |                   |                                                 |                               |                                                                                               |                            |
| R1+O <sub>2</sub> $\rightleftharpoons$ R1-2OO- <i>syn</i>  | 5.38E-05          | 4.36E+16                                        | 2.82E+04                      | 6.23E-20                                                                                      | 29.68                      |
| R1+O <sub>2</sub> $\rightleftharpoons$ R1-4OO- <i>syn</i>  | 5.38E-05          | 4.36E+16                                        | 6.65E+04                      | 1.47E-19                                                                                      | 70.04                      |
| R1+O <sub>2</sub> $\rightleftharpoons$ R1-2OO- <i>anti</i> | 1.01E-07          | 1.88E+19                                        | 4.44E+04                      | 1.85E-22                                                                                      | 0.09                       |
| R1+O <sub>2</sub> $\rightleftharpoons$ R1-4OO- <i>anti</i> | 1.01E-07          | 1.88E+19                                        | 9.44E+04                      | 3.92E-22                                                                                      | 0.19                       |
| <b><math>T=336</math> K</b>                                |                   |                                                 |                               |                                                                                               |                            |
| R1+O <sub>2</sub> $\rightleftharpoons$ R1-2OO- <i>syn</i>  | 3.60E-05          | 4.36E+16                                        | 6.23E+04                      | 9.23E-20                                                                                      | 35.44                      |
| R1+O <sub>2</sub> $\rightleftharpoons$ R1-4OO- <i>syn</i>  | 3.60E-05          | 4.36E+16                                        | 1.12E+05                      | 1.67E-19                                                                                      | 64.13                      |
| R1+O <sub>2</sub> $\rightleftharpoons$ R1-2OO- <i>anti</i> | 1.19E-07          | 1.88E+19                                        | 8.70E+04                      | 4.26E-22                                                                                      | 0.16                       |
| R1+O <sub>2</sub> $\rightleftharpoons$ R1-4OO- <i>anti</i> | 1.19E-07          | 1.88E+19                                        | 1.42E+05                      | 6.97E-22                                                                                      | 0.27                       |
| <b><math>T=400</math> K</b>                                |                   |                                                 |                               |                                                                                               |                            |
| R1+O <sub>2</sub> $\rightleftharpoons$ R1-2OO- <i>syn</i>  | 2.24E-05          | 4.36E+16                                        | 1.25E+05                      | 1.15E-19                                                                                      | 42.42                      |
| R1+O <sub>2</sub> $\rightleftharpoons$ R1-4OO- <i>syn</i>  | 2.24E-05          | 4.36E+16                                        | 1.67E+05                      | 1.54E-19                                                                                      | 56.81                      |
| R1+O <sub>2</sub> $\rightleftharpoons$ R1-2OO- <i>anti</i> | 1.51E-07          | 1.88E+19                                        | 1.50E+05                      | 9.32E-22                                                                                      | 0.34                       |
| R1+O <sub>2</sub> $\rightleftharpoons$ R1-4OO- <i>anti</i> | 1.51E-07          | 1.88E+19                                        | 1.86E+05                      | 1.16E-21                                                                                      | 0.43                       |

Table S2f:

| Parameter<br>Reaction pathway                              | $P = 10^{-6}$ bar |                                                 |                               |                                                                                               |                            |
|------------------------------------------------------------|-------------------|-------------------------------------------------|-------------------------------|-----------------------------------------------------------------------------------------------|----------------------------|
|                                                            | Rate constant     |                                                 |                               | effective rate constant<br>$k_{\text{eff}}(\text{cm}^3 \text{ molecule}^{-1} \text{ s}^{-1})$ | Branching<br>ratio ( $R$ ) |
|                                                            | $K_p$             | $k_{-1}$<br>IMz $\rightarrow$ R1+O <sub>2</sub> | $k_2$<br>IMz $\rightarrow$ R2 |                                                                                               |                            |
| <b><math>T=298</math> K</b>                                |                   |                                                 |                               |                                                                                               |                            |
| R1+O <sub>2</sub> $\rightleftharpoons$ R1-2OO- <i>syn</i>  | 5.38E-05          | 4.36E+16                                        | 7.09E+02                      | 1.57E-21                                                                                      | 38.59                      |
| R1+O <sub>2</sub> $\rightleftharpoons$ R1-4OO- <i>syn</i>  | 5.38E-05          | 4.36E+16                                        | 1.12E+03                      | 2.49E-21                                                                                      | 61.21                      |
| R1+O <sub>2</sub> $\rightleftharpoons$ R1-2OO- <i>anti</i> | 1.01E-07          | 1.88E+19                                        | 7.47E+02                      | 3.11E-24                                                                                      | 0.08                       |
| R1+O <sub>2</sub> $\rightleftharpoons$ R1-4OO- <i>anti</i> | 1.01E-07          | 1.88E+19                                        | 1.19E+03                      | 4.95E-24                                                                                      | 0.12                       |
| <b><math>T=336</math> K</b>                                |                   |                                                 |                               |                                                                                               |                            |
| R1+O <sub>2</sub> $\rightleftharpoons$ R1-2OO- <i>syn</i>  | 3.60E-05          | 4.36E+16                                        | 1.19E+03                      | 1.76E-21                                                                                      | 42.68                      |
| R1+O <sub>2</sub> $\rightleftharpoons$ R1-4OO- <i>syn</i>  | 3.60E-05          | 4.36E+16                                        | 1.59E+03                      | 2.35E-21                                                                                      | 56.98                      |
| R1+O <sub>2</sub> $\rightleftharpoons$ R1-2OO- <i>anti</i> | 1.19E-07          | 1.88E+19                                        | 1.23E+03                      | 6.04E-24                                                                                      | 0.15                       |
| R1+O <sub>2</sub> $\rightleftharpoons$ R1-4OO- <i>anti</i> | 1.19E-07          | 1.88E+19                                        | 1.64E+03                      | 8.05E-24                                                                                      | 0.20                       |
| <b><math>T=400</math> K</b>                                |                   |                                                 |                               |                                                                                               |                            |
| R1+O <sub>2</sub> $\rightleftharpoons$ R1-2OO- <i>syn</i>  | 2.24E-05          | 4.36E+16                                        | 1.73E+03                      | 1.60E-21                                                                                      | 46.88                      |
| R1+O <sub>2</sub> $\rightleftharpoons$ R1-4OO- <i>syn</i>  | 2.24E-05          | 4.36E+16                                        | 1.95E+03                      | 1.79E-21                                                                                      | 52.44                      |
| R1+O <sub>2</sub> $\rightleftharpoons$ R1-2OO- <i>anti</i> | 1.51E-07          | 1.88E+19                                        | 1.76E+03                      | 1.09E-23                                                                                      | 0.32                       |
| R1+O <sub>2</sub> $\rightleftharpoons$ R1-4OO- <i>anti</i> | 1.51E-07          | 1.88E+19                                        | 1.97E+03                      | 1.22E-23                                                                                      | 0.36                       |

**Table S2g:**

| Reaction pathway                                           | $P = 10^{-8}$ bar |                                                 |                               |                                                                                               |                                           | Branching ratio ( $R$ ) |
|------------------------------------------------------------|-------------------|-------------------------------------------------|-------------------------------|-----------------------------------------------------------------------------------------------|-------------------------------------------|-------------------------|
|                                                            | Rate constant     |                                                 |                               | effective rate constant<br>$k_{\text{eff}}(\text{cm}^3 \text{ molecule}^{-1} \text{ s}^{-1})$ |                                           |                         |
|                                                            | $K_p$             | $k_{-1}$<br>IMz $\rightarrow$ R1+O <sub>2</sub> | $k_2$<br>IMz $\rightarrow$ R2 |                                                                                               | R1+O <sub>2</sub> $\rightleftharpoons$ R2 |                         |
| <b><math>T=298</math> K</b>                                |                   |                                                 |                               |                                                                                               |                                           |                         |
| R1+O <sub>2</sub> $\rightleftharpoons$ R1-2OO- <i>syn</i>  | 5.38E-05          | 4.36E+16                                        | 8.02E+00                      | 1.78E-23                                                                                      | 40.75                                     |                         |
| R1+O <sub>2</sub> $\rightleftharpoons$ R1-4OO- <i>syn</i>  | 5.38E-05          | 4.36E+16                                        | 1.17E+01                      | 2.58E-23                                                                                      | 59.06                                     |                         |
| R1+O <sub>2</sub> $\rightleftharpoons$ R1-2OO- <i>anti</i> | 1.01E-07          | 1.88E+19                                        | 7.83E+00                      | 3.26E-26                                                                                      | 0.07                                      |                         |
| R1+O <sub>2</sub> $\rightleftharpoons$ R1-4OO- <i>anti</i> | 1.01E-07          | 1.88E+19                                        | 1.20E+01                      | 4.99E-26                                                                                      | 0.11                                      |                         |
| <b><math>T=336</math> K</b>                                |                   |                                                 |                               |                                                                                               |                                           |                         |
| R1+O <sub>2</sub> $\rightleftharpoons$ R1-2OO- <i>syn</i>  | 3.60E-05          | 4.36E+16                                        | 1.29E+01                      | 1.91E-23                                                                                      | 44.07                                     |                         |
| R1+O <sub>2</sub> $\rightleftharpoons$ R1-4OO- <i>syn</i>  | 3.60E-05          | 4.36E+16                                        | 1.62E+01                      | 2.41E-23                                                                                      | 55.60                                     |                         |
| R1+O <sub>2</sub> $\rightleftharpoons$ R1-2OO- <i>anti</i> | 1.19E-07          | 1.88E+19                                        | 1.27E+01                      | 6.21E-26                                                                                      | 0.14                                      |                         |
| R1+O <sub>2</sub> $\rightleftharpoons$ R1-4OO- <i>anti</i> | 1.19E-07          | 1.88E+19                                        | 1.65E+01                      | 8.09E-26                                                                                      | 0.19                                      |                         |
| <b><math>T=400</math> K</b>                                |                   |                                                 |                               |                                                                                               |                                           |                         |
| R1+O <sub>2</sub> $\rightleftharpoons$ R1-2OO- <i>syn</i>  | 2.24E-05          | 4.36E+16                                        | 1.79E+01                      | 1.65E-23                                                                                      | 47.37                                     |                         |
| R1+O <sub>2</sub> $\rightleftharpoons$ R1-4OO- <i>syn</i>  | 2.24E-05          | 4.36E+16                                        | 1.96E+01                      | 1.81E-23                                                                                      | 51.96                                     |                         |
| R1+O <sub>2</sub> $\rightleftharpoons$ R1-2OO- <i>anti</i> | 1.51E-07          | 1.88E+19                                        | 1.78E+01                      | 1.11E-25                                                                                      | 0.32                                      |                         |
| R1+O <sub>2</sub> $\rightleftharpoons$ R1-4OO- <i>anti</i> | 1.51E-07          | 1.88E+19                                        | 1.97E+01                      | 1.23E-25                                                                                      | 0.35                                      |                         |

**Table S2h:**

| Reaction pathway                                           | $P = 10^{-10}$ bar |                                                 |                               |                                                                                               |                                           | Branching ratio ( $R$ ) |
|------------------------------------------------------------|--------------------|-------------------------------------------------|-------------------------------|-----------------------------------------------------------------------------------------------|-------------------------------------------|-------------------------|
|                                                            | Rate constant      |                                                 |                               | effective rate constant<br>$k_{\text{eff}}(\text{cm}^3 \text{ molecule}^{-1} \text{ s}^{-1})$ |                                           |                         |
|                                                            | $K_p$              | $k_{-1}$<br>IMz $\rightarrow$ R1+O <sub>2</sub> | $k_2$<br>IMz $\rightarrow$ R2 |                                                                                               | R1+O <sub>2</sub> $\rightleftharpoons$ R2 |                         |
| <b><math>T=298</math> K</b>                                |                    |                                                 |                               |                                                                                               |                                           |                         |
| R1+O <sub>2</sub> $\rightleftharpoons$ R1-2OO- <i>syn</i>  | 5.38E-05           | 4.36E+16                                        | 8.04E-02                      | 1.78E-25                                                                                      | 40.66                                     |                         |
| R1+O <sub>2</sub> $\rightleftharpoons$ R1-4OO- <i>syn</i>  | 5.38E-05           | 4.36E+16                                        | 1.17E-01                      | 2.59E-25                                                                                      | 59.16                                     |                         |
| R1+O <sub>2</sub> $\rightleftharpoons$ R1-2OO- <i>anti</i> | 1.01E-07           | 1.88E+19                                        | 7.84E-02                      | 3.26E-28                                                                                      | 0.07                                      |                         |
| R1+O <sub>2</sub> $\rightleftharpoons$ R1-4OO- <i>anti</i> | 1.01E-07           | 1.88E+19                                        | 1.20E-01                      | 4.99E-28                                                                                      | 0.11                                      |                         |
| <b><math>T=336</math> K</b>                                |                    |                                                 |                               |                                                                                               |                                           |                         |
| R1+O <sub>2</sub> $\rightleftharpoons$ R1-2OO- <i>syn</i>  | 3.60E-05           | 4.36E+16                                        | 1.29E-01                      | 1.91E-25                                                                                      | 44.07                                     |                         |
| R1+O <sub>2</sub> $\rightleftharpoons$ R1-4OO- <i>syn</i>  | 3.60E-05           | 4.36E+16                                        | 1.62E-01                      | 2.41E-25                                                                                      | 55.60                                     |                         |
| R1+O <sub>2</sub> $\rightleftharpoons$ R1-2OO- <i>anti</i> | 1.19E-07           | 1.88E+19                                        | 1.27E-01                      | 6.21E-28                                                                                      | 0.14                                      |                         |
| R1+O <sub>2</sub> $\rightleftharpoons$ R1-4OO- <i>anti</i> | 1.19E-07           | 1.88E+19                                        | 1.65E-01                      | 8.09E-28                                                                                      | 0.19                                      |                         |
| <b><math>T=400</math> K</b>                                |                    |                                                 |                               |                                                                                               |                                           |                         |
| R1+O <sub>2</sub> $\rightleftharpoons$ R1-2OO- <i>syn</i>  | 2.24E-05           | 4.36E+16                                        | 1.79E-01                      | 1.65E-25                                                                                      | 47.37                                     |                         |
| R1+O <sub>2</sub> $\rightleftharpoons$ R1-4OO- <i>syn</i>  | 2.24E-05           | 4.36E+16                                        | 1.96E-01                      | 1.81E-25                                                                                      | 51.96                                     |                         |
| R1+O <sub>2</sub> $\rightleftharpoons$ R1-2OO- <i>anti</i> | 1.51E-07           | 1.88E+19                                        | 1.78E-01                      | 1.11E-27                                                                                      | 0.32                                      |                         |
| R1+O <sub>2</sub> $\rightleftharpoons$ R1-4OO- <i>anti</i> | 1.51E-07           | 1.88E+19                                        | 1.97E-01                      | 1.23E-27                                                                                      | 0.35                                      |                         |

**Table S2i:**

| Reaction pathway                                           | $P = 10^{-12}$ bar |                                                 |                               |                                                                                               |                         |
|------------------------------------------------------------|--------------------|-------------------------------------------------|-------------------------------|-----------------------------------------------------------------------------------------------|-------------------------|
|                                                            | Rate constant      |                                                 |                               | effective rate constant<br>$k_{\text{eff}}(\text{cm}^3 \text{ molecule}^{-1} \text{ s}^{-1})$ | Branching ratio ( $R$ ) |
|                                                            | $K_p$              | $k_{-1}$<br>IMz $\rightarrow$ R1+O <sub>2</sub> | $k_2$<br>IMz $\rightarrow$ R2 |                                                                                               |                         |
| <b><math>T=298</math> K</b>                                |                    |                                                 |                               |                                                                                               |                         |
| R1+O <sub>2</sub> $\rightleftharpoons$ R1-2OO- <i>syn</i>  | 5.38E-05           | 4.36E+16                                        | 8.04E-04                      | 1.78E-27                                                                                      | 40.66                   |
| R1+O <sub>2</sub> $\rightleftharpoons$ R1-4OO- <i>syn</i>  | 5.38E-05           | 4.36E+16                                        | 1.17E-03                      | 2.59E-27                                                                                      | 59.16                   |
| R1+O <sub>2</sub> $\rightleftharpoons$ R1-2OO- <i>anti</i> | 1.01E-07           | 1.88E+19                                        | 7.84E-04                      | 3.26E-30                                                                                      | 0.07                    |
| R1+O <sub>2</sub> $\rightleftharpoons$ R1-4OO- <i>anti</i> | 1.01E-07           | 1.88E+19                                        | 1.20E-03                      | 4.99E-30                                                                                      | 0.11                    |
| <b><math>T=336</math> K</b>                                |                    |                                                 |                               |                                                                                               |                         |
| R1+O <sub>2</sub> $\rightleftharpoons$ R1-2OO- <i>syn</i>  | 3.60E-05           | 4.36E+16                                        | 1.29E-03                      | 1.91E-27                                                                                      | 44.07                   |
| R1+O <sub>2</sub> $\rightleftharpoons$ R1-4OO- <i>syn</i>  | 3.60E-05           | 4.36E+16                                        | 1.62E-03                      | 2.41E-27                                                                                      | 55.60                   |
| R1+O <sub>2</sub> $\rightleftharpoons$ R1-2OO- <i>anti</i> | 1.19E-07           | 1.88E+19                                        | 1.27E-03                      | 6.21E-30                                                                                      | 0.14                    |
| R1+O <sub>2</sub> $\rightleftharpoons$ R1-4OO- <i>anti</i> | 1.19E-07           | 1.88E+19                                        | 1.65E-03                      | 8.09E-30                                                                                      | 0.19                    |
| <b><math>T=400</math> K</b>                                |                    |                                                 |                               |                                                                                               |                         |
| R1+O <sub>2</sub> $\rightleftharpoons$ R1-2OO- <i>syn</i>  | 2.24E-05           | 4.36E+16                                        | 1.79E-03                      | 1.65E-27                                                                                      | 47.37                   |
| R1+O <sub>2</sub> $\rightleftharpoons$ R1-4OO- <i>syn</i>  | 2.24E-05           | 4.36E+16                                        | 1.96E-03                      | 1.81E-27                                                                                      | 51.96                   |
| R1+O <sub>2</sub> $\rightleftharpoons$ R1-2OO- <i>anti</i> | 1.51E-07           | 1.88E+19                                        | 1.78E-03                      | 1.11E-29                                                                                      | 0.32                    |
| R1+O <sub>2</sub> $\rightleftharpoons$ R1-4OO- <i>anti</i> | 1.51E-07           | 1.88E+19                                        | 1.97E-03                      | 1.23E-29                                                                                      | 0.35                    |

**Table S3:** Dependence upon the pressure and temperature of the regioselectivities [ $\text{RSI} = R(3) - R(1) / R(1) + R(3)$ ] and [ $\text{RSI} = R(4) - R(2) / R(2) + R(4)$ ] of O<sub>2</sub> addition in *syn* and *anti* modes onto the naphthalene-OH adduct [C<sub>10</sub>H<sub>8</sub>OH]<sup>•</sup>, according to the RRKM estimates of effective rate constants [ $k_{\text{eff}}(1)$ ,  $k_{\text{eff}}(2)$ ,  $k_{\text{eff}}(3)$ ,  $k_{\text{eff}}(4)$ ].

**Table S3a:** ( $T= 298$  K; *syn* isomer)

| $P$ (bar) | $k_{\text{eff}}(1)$ | $k_{\text{eff}}(3)$ | $k_{\text{eff}}[(1)+(3)]$ | $R(1)$ | $R(3)$ | Log $P$ | $[R(3) - R(1)] / [R(3) + R(1)]$ |
|-----------|---------------------|---------------------|---------------------------|--------|--------|---------|---------------------------------|
| 1.00E+04  | 3.93E-19            | 2.38E-18            | 2.77E-18                  | 13.95  | 84.49  | 4       | 0.7166                          |
| 1.00E+02  | 3.93E-19            | 2.38E-18            | 2.77E-18                  | 13.95  | 84.49  | 2       | 0.7166                          |
| 1.00E+00  | 3.93E-19            | 2.36E-18            | 2.75E-18                  | 14.06  | 84.44  | 0       | 0.7145                          |
| 1.00E-02  | 3.41E-19            | 1.67E-18            | 2.01E-18                  | 16.84  | 82.45  | -2      | 0.6609                          |
| 1.00E-04  | 6.23E-20            | 1.47E-19            | 2.09E-19                  | 29.68  | 70.04  | -4      | 0.4047                          |
| 1.00E-06  | 1.57E-21            | 2.49E-21            | 4.06E-21                  | 38.59  | 61.21  | -6      | 0.2266                          |
| 1.00E-08  | 1.78E-23            | 2.58E-23            | 4.36E-23                  | 40.75  | 59.06  | -8      | 0.1835                          |
| 1.00E-10  | 1.78E-25            | 2.59E-25            | 4.37E-25                  | 40.66  | 59.16  | -10     | 0.1854                          |
| 1.00E-12  | 1.78E-27            | 2.59E-27            | 4.37E-27                  | 40.66  | 59.16  | -12     | 0.1854                          |



**Table S3b:** ( $T= 336$  K; *syn* isomer)

| $P$ (bar) | $k_{\text{eff}}(\mathbf{1})$ | $k_{\text{eff}}(\mathbf{3})$ | $k_{\text{eff}}[(\mathbf{1})+(\mathbf{3})]$ | $R(\mathbf{1})$ | $R(\mathbf{3})$ | $\text{Log } P$ | $[R(\mathbf{3})-R(\mathbf{1})]/[R(\mathbf{3})+R(\mathbf{1})]$ |
|-----------|------------------------------|------------------------------|---------------------------------------------|-----------------|-----------------|-----------------|---------------------------------------------------------------|
| 1.00E+04  | 1.05E-18                     | 5.29E-18                     | 6.34E-18                                    | 16.10           | 81.13           | 4               | 0.6688                                                        |
| 1.00E+02  | 1.05E-18                     | 5.29E-18                     | 6.34E-18                                    | 16.10           | 81.13           | 2               | 0.6688                                                        |
| 1.00E+00  | 1.05E-18                     | 5.23E-18                     | 6.28E-18                                    | 16.29           | 81.14           | 0               | 0.6656                                                        |
| 1.00E-02  | 8.13E-19                     | 3.01E-18                     | 3.82E-18                                    | 21.05           | 77.94           | -2              | 0.5747                                                        |
| 1.00E-04  | 9.23E-20                     | 1.67E-19                     | 2.59E-19                                    | 35.44           | 64.13           | -4              | 0.2881                                                        |
| 1.00E-06  | 1.76E-21                     | 2.35E-21                     | 4.11E-21                                    | 42.68           | 56.98           | -6              | 0.1436                                                        |
| 1.00E-08  | 1.91E-23                     | 2.41E-23                     | 4.32E-23                                    | 44.07           | 55.60           | -8              | 0.1157                                                        |
| 1.00E-10  | 1.91E-25                     | 2.41E-25                     | 4.32E-25                                    | 44.07           | 55.60           | -10             | 0.1157                                                        |
| 1.00E-12  | 1.91E-27                     | 2.41E-27                     | 4.32E-27                                    | 44.07           | 55.60           | -12             | 0.1157                                                        |

**Table S3c:** ( $T= 400$  K; *syn* isomer)

| $P$ (bar) | $k_{\text{eff}}(\mathbf{1})$ | $k_{\text{eff}}(\mathbf{3})$ | $k_{\text{eff}}[(\mathbf{1})+(\mathbf{3})]$ | $R(\mathbf{1})$ | $R(\mathbf{3})$ | $\text{Log } P$ | $[R(\mathbf{3})-R(\mathbf{1})]/[R(\mathbf{3})+R(\mathbf{1})]$ |
|-----------|------------------------------|------------------------------|---------------------------------------------|-----------------|-----------------|-----------------|---------------------------------------------------------------|
| 1.00E+04  | 3.69E-18                     | 1.47E-17                     | 1.84E-17                                    | 18.94           | 75.43           | 4               | 0.5987                                                        |
| 1.00E+02  | 3.69E-18                     | 1.47E-17                     | 1.84E-17                                    | 18.94           | 75.44           | 2               | 0.5987                                                        |
| 1.00E+00  | 3.65E-18                     | 1.43E-17                     | 1.80E-17                                    | 19.36           | 75.86           | 0               | 0.5933                                                        |
| 1.00E-02  | 2.13E-18                     | 5.29E-18                     | 7.42E-18                                    | 28.28           | 70.23           | -2              | 0.4259                                                        |
| 1.00E-04  | 1.15E-19                     | 1.54E-19                     | 2.69E-19                                    | 42.42           | 56.81           | -4              | 0.1450                                                        |
| 1.00E-06  | 1.60E-21                     | 1.79E-21                     | 3.39E-21                                    | 46.88           | 52.44           | -6              | 0.0560                                                        |
| 1.00E-08  | 1.65E-23                     | 1.81E-23                     | 3.46E-23                                    | 47.37           | 51.96           | -8              | 0.0462                                                        |
| 1.00E-10  | 1.65E-25                     | 1.81E-25                     | 3.46E-25                                    | 47.37           | 51.96           | -10             | 0.0462                                                        |
| 1.00E-12  | 1.65E-27                     | 1.81E-27                     | 3.46E-27                                    | 47.37           | 51.96           | -12             | 0.0462                                                        |

**Table S3d:** ( $T= 298$  K; *anti* isomer)

| $P$ (bar) | $k_{\text{eff}}(\mathbf{2})$ | $k_{\text{eff}}(\mathbf{4})$ | $k_{\text{eff}}[(\mathbf{2})+(\mathbf{4})]$ | $R(\mathbf{2})$ | $R(\mathbf{4})$ | $\text{Log } P$ | $[R(\mathbf{4})-R(\mathbf{2})]/[R(\mathbf{4})+R(\mathbf{2})]$ |
|-----------|------------------------------|------------------------------|---------------------------------------------|-----------------|-----------------|-----------------|---------------------------------------------------------------|
| 1.00E+04  | 4.92E-21                     | 3.90E-20                     | 4.39E-20                                    | 0.17            | 1.38            | 4               | 0.7760                                                        |
| 1.00E+02  | 4.92E-21                     | 3.90E-20                     | 4.39E-20                                    | 0.17            | 1.38            | 2               | 0.7760                                                        |
| 1.00E+00  | 4.85E-21                     | 3.71E-20                     | 4.20E-20                                    | 0.17            | 1.33            | 0               | 0.7688                                                        |
| 1.00E-02  | 2.72E-21                     | 1.17E-20                     | 1.44E-20                                    | 0.13            | 0.58            | -2              | 0.6227                                                        |
| 1.00E-04  | 1.85E-22                     | 3.92E-22                     | 5.77E-22                                    | 0.09            | 0.19            | -4              | 0.3588                                                        |
| 1.00E-06  | 3.11E-24                     | 4.95E-24                     | 8.06E-24                                    | 0.08            | 0.12            | -6              | 0.2283                                                        |
| 1.00E-08  | 3.26E-26                     | 4.99E-26                     | 8.25E-26                                    | 0.07            | 0.11            | -8              | 0.2097                                                        |
| 1.00E-10  | 3.26E-28                     | 4.99E-28                     | 8.25E-28                                    | 0.07            | 0.11            | -10             | 0.2097                                                        |
| 1.00E-12  | 3.26E-30                     | 4.99E-30                     | 8.25E-30                                    | 0.07            | 0.11            | -12             | 0.2097                                                        |

**Table S3e:** ( $T= 336$  K; *anti* isomer)

| $P$ (bar) | $k_{\text{eff}}(\mathbf{2})$ | $k_{\text{eff}}(\mathbf{4})$ | $k_{\text{eff}}[(\mathbf{2})+(\mathbf{4})]$ | $R(\mathbf{2})$ | $R(\mathbf{4})$ | Log $P$ | $[R(\mathbf{4})-R(\mathbf{2})]/[R(\mathbf{4})+R(\mathbf{2})]$ |
|-----------|------------------------------|------------------------------|---------------------------------------------|-----------------|-----------------|---------|---------------------------------------------------------------|
| 1.00E+04  | 2.45E-20                     | 1.56E-19                     | 1.81E-19                                    | 0.38            | 2.39            | 4       | 0.7285                                                        |
| 1.00E+02  | 2.45E-20                     | 1.56E-19                     | 1.81E-19                                    | 0.38            | 2.39            | 2       | 0.7285                                                        |
| 1.00E+00  | 2.37E-20                     | 1.42E-19                     | 1.66E-19                                    | 0.37            | 2.20            | 0       | 0.7139                                                        |
| 1.00E-02  | 9.79E-21                     | 2.94E-20                     | 3.92E-20                                    | 0.25            | 0.76            | -2      | 0.5004                                                        |
| 1.00E-04  | 4.26E-22                     | 6.97E-22                     | 1.12E-21                                    | 0.16            | 0.27            | -4      | 0.2413                                                        |
| 1.00E-06  | 6.04E-24                     | 8.05E-24                     | 1.41E-23                                    | 0.15            | 0.20            | -6      | 0.1427                                                        |
| 1.00E-08  | 6.21E-26                     | 8.09E-26                     | 1.43E-25                                    | 0.14            | 0.19            | -8      | 0.1315                                                        |
| 1.00E-10  | 6.21E-28                     | 8.09E-28                     | 1.43E-27                                    | 0.14            | 0.19            | -10     | 0.1315                                                        |
| 1.00E-12  | 6.21E-30                     | 8.09E-30                     | 1.43E-29                                    | 0.14            | 0.19            | -12     | 0.1315                                                        |

**Table S3f:** ( $T= 400$  K; *anti* isomer)

| $P$ (bar) | $k_{\text{eff}}(\mathbf{2})$ | $k_{\text{eff}}(\mathbf{4})$ | $k_{\text{eff}}[(\mathbf{2})+(\mathbf{4})]$ | $R(\mathbf{2})$ | $R(\mathbf{4})$ | Log $P$ | $[R(\mathbf{4})-R(\mathbf{2})]/[R(\mathbf{4})+R(\mathbf{2})]$ |
|-----------|------------------------------|------------------------------|---------------------------------------------|-----------------|-----------------|---------|---------------------------------------------------------------|
| 1.00E+04  | 1.87E-19                     | 9.10E-19                     | 1.10E-18                                    | 0.96            | 4.67            | 4       | 0.6591                                                        |
| 1.00E+02  | 1.87E-19                     | 9.08E-19                     | 1.10E-18                                    | 0.96            | 4.66            | 2       | 0.6584                                                        |
| 1.00E+00  | 1.72E-19                     | 7.29E-19                     | 9.01E-19                                    | 0.91            | 3.87            | 0       | 0.6182                                                        |
| 1.00E-02  | 3.87E-20                     | 7.40E-20                     | 1.13E-19                                    | 0.51            | 0.98            | -2      | 0.3132                                                        |
| 1.00E-04  | 9.32E-22                     | 1.16E-21                     | 2.09E-21                                    | 0.34            | 0.43            | -4      | 0.1090                                                        |
| 1.00E-06  | 1.09E-23                     | 1.22E-23                     | 2.31E-23                                    | 0.32            | 0.36            | -6      | 0.0563                                                        |
| 1.00E-08  | 1.11E-25                     | 1.23E-25                     | 2.34E-25                                    | 0.32            | 0.35            | -8      | 0.0513                                                        |
| 1.00E-10  | 1.11E-27                     | 1.23E-27                     | 2.34E-27                                    | 0.32            | 0.35            | -10     | 0.0513                                                        |
| 1.00E-12  | 1.11E-29                     | 1.23E-29                     | 2.34E-29                                    | 0.32            | 0.35            | -12     | 0.0513                                                        |
